# Supplementary material for: Diagnosis of Parkinson syndrome and Lewy-body disease using 123I-ioflupane images and a model with image features based on machine learning
Source: Springer Nature journal article supplement (doi:10.1007/s12149-022-01759-z), 2022-07-07
Supplement: MOESM1 [file 23247842]

# Diagnosis of Parkinson syndrome and Lewy-body disease using $^{123}\text{I}$ -ioflupane images and a model with image features based on machine learning

Nakajima K, et al.

Supplementary data

Putamen and caudate uptake determined by ROI-based calculation. Sizes and shapes of circles and ellipses can be changed if necessary. Putamen: caudate average count ratio significantly differs between comma and dot-like patterns (n = 137).

Samples of regions of interest in caudate and putamen

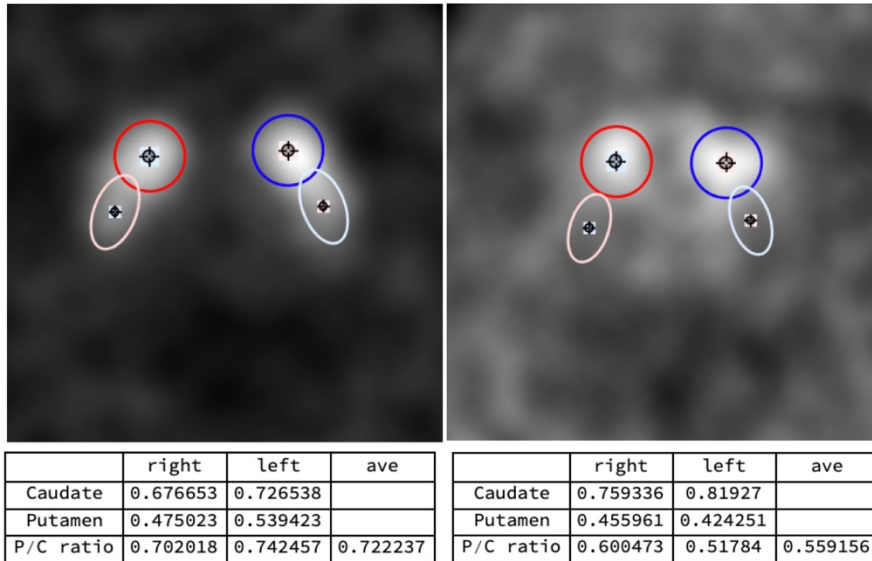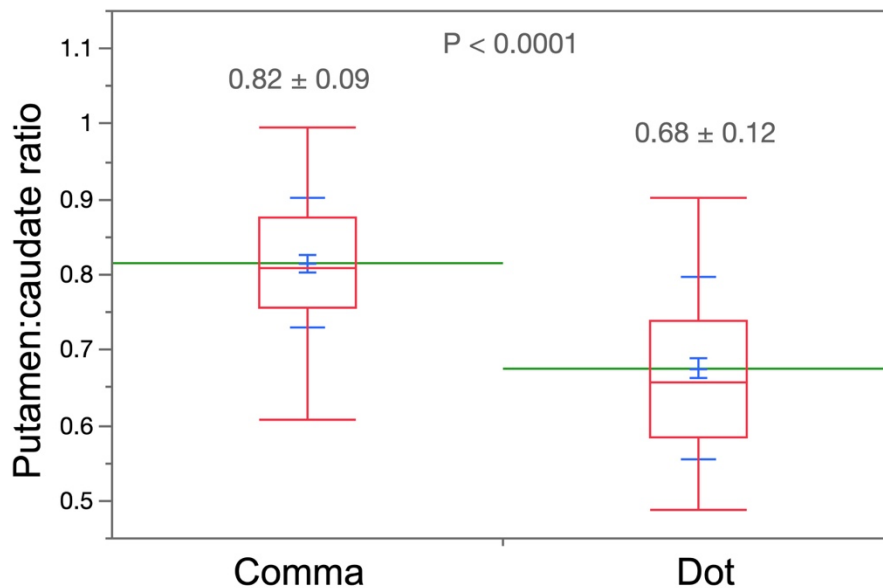

The boxplot denotes median and 1<sup>st</sup> and 3<sup>rd</sup> quartiles, and whiskers for value ranges. Mean line (green), error bar and standard deviation (blue).
